# Supplementary material for: Influence of Oxygen Management during the Post-Fermentation Stage on Acetaldehyde, Color, and Phenolics of Vitis vinifera L. Cv. Cabernet Sauvignon Wine
Source: MDPI journal article supplement (doi:10.3390/molecules27196692), 2022-10-08
Supplement: s1 [file s1]

# Influence of Oxygen Management during the Post-Fermentation Stage on Acetaldehyde, Color, and Phenolics of *Vitis vinifera* L. Cv. Cabernet Sauvignon Wine

Lingmin Dai <sup>1</sup>, Yuhang Sun <sup>1</sup>, Muqing Liu <sup>1</sup>, Xiaoqian Cui <sup>1</sup>, Jiaqi Wang <sup>1</sup>, Jiming Li <sup>2</sup> and Guomin Han <sup>1,\*</sup>

<sup>1</sup> School of Bioengineering, Qilu University of Technology (Shandong Academy of Sciences), Jinan 250353, China

<sup>2</sup> Yantai Changyu Group Corporation Ltd., Yantai 264001, China

\* Correspondence: gmhan@qlu.edu.cn

**Table S1.** Dissolved oxygen (mg/L) variation for wines treated with different oxygen exposure

**Table S2.** The evolution of acetaldehyde (mg/L) during oxygen treatment

**Table S3.** The effects of different oxygen exposure levels on the total phenol and tannin, monomeric (%), copigmented (%) and polymeric (%), MP, SPP and LPP and WC, CDRSO<sub>2</sub>, CD and Hue after oxygenation of five phases

**Table S4.** The evolution of selected chemical parameters during the five oxygenation cycles

**Table S5.** Total oxygen consumption (mg/L) during treatment

**Table S1.** Dissolved oxygen (mg/L) variation for wines treated with different oxygen exposure.

| Time (d) | LO1  | LO2  | MO1  | MO2  | HO1  | HO2  |
|----------|------|------|------|------|------|------|
| 1        | 0.63 | 0.6  | 1.43 | 1.37 | 3.41 | 3.2  |
| 2        | 0.51 | 0.48 | 1.02 | 0.98 | 2.78 | 2.59 |
| 3        | 0.42 | 0.4  | 0.87 | 0.84 | 2.43 | 2.26 |
| 4        | 0.39 | 0.36 | 0.53 | 0.51 | 2.18 | 2.03 |
| 5        | 0.35 | 0.33 | 0.35 | 0.33 | 1.76 | 1.64 |
| 6        | 0.28 | 0.23 | 0.28 | 0.27 | 1.54 | 1.43 |
| 7        | 0.12 | 0.11 | 0.12 | 0.11 | 1.26 | 1.17 |
| 8        | 0.1  | 0.1  | 0.1  | 0.1  | 1.1  | 1.02 |
| 9        | 0.1  | 0.1  | 0.1  | 0.1  | 0.81 | 0.75 |
| 10       | 0.1  | 0.1  | 0.1  | 0.1  | 0.53 | 0.49 |
| 11       | 0.1  | 0.1  | 0.1  | 0.1  | 0.35 | 0.33 |
| 12       | 0.1  | 0.1  | 0.1  | 0.1  | 0.21 | 0.2  |
| 13       | 0.1  | 0.1  | 0.1  | 0.1  | 0.1  | 0.1  |
| 14       | 0.1  | 0.1  | 0.1  | 0.1  | 0.1  | 0.1  |
| 15       | 0.1  | 0.1  | 0.1  | 0.1  | 0.1  | 0.1  |
| 16       | 0.1  | 0.1  | 0.1  | 0.1  | 0.1  | 0.1  |
| 17       | 0.1  | 0.1  | 0.1  | 0.1  | 0.1  | 0.1  |
| 18       | 0.1  | 0.1  | 0.1  | 0.1  | 0.1  | 0.1  |
| 19       | 0.1  | 0.1  | 0.1  | 0.1  | 0.1  | 0.1  |
| 20       | 0.1  | 0.1  | 0.1  | 0.1  | 0.1  | 0.1  |
| 21       | 0.1  | 0.1  | 0.1  | 0.1  | 0.1  | 0.1  |
| 22       | 0.1  | 0.1  | 0.1  | 0.1  | 0.1  | 0.1  |
| 23       | 0.1  | 0.1  | 0.1  | 0.1  | 0.1  | 0.1  |
| 24       | 0.1  | 0.1  | 0.1  | 0.1  | 0.1  | 0.1  |
| 25       | 0.1  | 0.1  | 0.1  | 0.1  | 0.1  | 0.1  |
| 26       | 0.1  | 0.1  | 0.1  | 0.1  | 0.1  | 0.1  |
| 27       | 0.1  | 0.1  | 0.1  | 0.1  | 0.1  | 0.1  |
| 28       | 0.1  | 0.1  | 0.1  | 0.1  | 0.1  | 0.1  |
| 29       | 0.7  | 0.67 | 1.12 | 1.12 | 3.88 | 3.61 |
| 30       | 0.39 | 0.37 | 0.57 | 0.55 | 0.1  | 0.1  |
| 31       | 0.2  | 0.1  | 0.2  | 0.1  | 0.1  | 0.1  |
| 32       | 0.1  | 0.1  | 0.1  | 0.1  | 0.1  | 0.1  |
| 33       | 0.1  | 0.1  | 0.1  | 0.1  | 0.1  | 0.1  |
| 34       | 0.1  | 0.1  | 0.1  | 0.1  | 0.1  | 0.1  |
| 35       | 0.1  | 0.1  | 0.1  | 0.1  | 0.1  | 0.1  |
| 36       | 0.1  | 0.1  | 0.1  | 0.1  | 0.1  | 0.1  |
| 37       | 0.7  | 0.67 | 1.06 | 1.2  | 3.18 | 2.96 |
| 38       | 0.67 | 0.64 | 0.37 | 0.36 | 0.63 | 0.59 |
| 39       | 0.67 | 0.63 | 0.1  | 0.1  | 0.2  | 0.19 |
| 40       | 0.3  | 0.29 | 0.1  | 0.1  | 0.1  | 0.1  |
| 41       | 0.1  | 0.1  | 0.1  | 0.1  | 0.1  | 0.1  |
| 42       | 0.1  | 0.1  | 0.1  | 0.1  | 0.1  | 0.1  |
| 43       | 0.1  | 0.1  | 0.1  | 0.1  | 0.1  | 0.1  |
| 44       | 0.1  | 0.1  | 0.1  | 0.1  | 0.1  | 0.1  |
| 45       | 0.1  | 0.1  | 0.1  | 0.1  | 0.1  | 0.1  |
| 46       | 0.1  | 0.1  | 0.1  | 0.1  | 0.1  | 0.1  |
| 47       | 0.1  | 0.1  | 0.1  | 0.1  | 0.1  | 0.1  |
| 48       | 0.1  | 0.1  | 0.1  | 0.1  | 0.1  | 0.1  |
| 49       | 0.1  | 0.1  | 0.1  | 0.1  | 0.1  | 0.1  |
| 50       | 0.5  | 0.48 | 1.06 | 1.02 | 3.65 | 3.39 |
| 51       | 0.1  | 0.1  | 0.2  | 0.19 | 1.65 | 1.53 |
| 52       | 0.1  | 0.1  | 0.1  | 0.1  | 0.1  | 0.1  |
| 53       | 0.1  | 0.1  | 0.1  | 0.1  | 0.1  | 0.1  |
| 54       | 0.1  | 0.1  | 0.1  | 0.1  | 0.1  | 0.1  |

|    |     |      |      |      |      |      |
|----|-----|------|------|------|------|------|
| 55 | 0.1 | 0.1  | 0.1  | 0.1  | 0.1  | 0.1  |
| 56 | 0.1 | 0.1  | 0.1  | 0.1  | 0.1  | 0.1  |
| 57 | 0.5 | 0.48 | 1.69 | 1.62 | 3.23 | 3    |
| 58 | 0.1 | 0.1  | 1.06 | 1.02 | 0.57 | 0.53 |
| 59 | 0.1 | 0.1  | 0.3  | 0.29 | 0.1  | 0.1  |
| 60 | 0.1 | 0.1  | 0.1  | 0.1  | 0.1  | 0.1  |

Abbreviations: LO, low-level oxygenation wine (0.5–0.9 mg O<sub>2</sub>/L per time); MO, medium-level oxygenation wine (1–1.9 mg O<sub>2</sub>/L per time); HO, high-level oxygenation wine (3–3.9 mg O<sub>2</sub>/L per time).

**Table S2.** The evolution of acetaldehyde (mg/L) during oxygen treatment.

|         | CK        | LO        | MO        | HO         |
|---------|-----------|-----------|-----------|------------|
| initial | 3.79±0.31 | 3.79±0.48 | 3.79±0.31 | 3.79±0.47  |
| phase1  | 3.91±0.35 | 4.05±0.44 | 3.97±0.24 | 3.84±0.51  |
| phase2  | 4.06±0.2  | 4.32±0.39 | 4.11±0.34 | 5.36±0.38  |
| phase3  | 3.95±0.19 | 4.35±0.37 | 4.02±0.49 | 6.02±0.27  |
| phase4  | 3.83±0.53 | 4.18±0.53 | 4.64±0.51 | 7.85±0.6   |
| phase5  | 4.11±0.51 | 4.21±0.57 | 5.13±0.52 | 10.92±0.58 |

Abbreviations: initial, initial wine before oxidation treatment; CK, anaerobic wine (0 mg O<sub>2</sub>/L per time); LO, low-level oxygenation wine (0.5–0.9 mg O<sub>2</sub>/L per time); MO, medium-level oxygenation wine (1–1.9 mg O<sub>2</sub>/L per time); HO, high-level oxygenation wine (3–3.9 mg O<sub>2</sub>/L per time).

**Table S3.** The effects of different oxygen exposure levels on the total phenol and tannin, monomeric (%), copigmented (%) and polymeric (%), MP, SPP and LPP and WC, CDRSO<sub>2</sub>, CD and Hue after oxygenation of five phases

|                    | Control     | LO         | MO          | HO         |
|--------------------|-------------|------------|-------------|------------|
| Total phenol       | 1.43±0.039  | 1.34±0.11  | 1.43±0.02   | 1.35±0.06  |
| Tannin             | 0.59±0.064  | 0.53±0.033 | 0.6±0.061   | 0.56±0.015 |
| monomeric (%)      | 32.3±0.5    | 27.84±0.31 | 28.04±1.12  | 20.03±0.58 |
| copigmented (%)    | 21.8±0.32   | 22.9±0.5   | 21.96±0.89  | 22.17±0.52 |
| polymeric (%)      | 45.92±1.11  | 48.24±0.89 | 50.00±1.40  | 57.80±1.08 |
| MP                 | 1.65±0.028  | 1.74±0.011 | 1.76±0.002  | 1.84±0.023 |
| SPP                | 0.79±0.0075 | 0.82±0.006 | 0.83±0.013  | 0.98±0.007 |
| LPP                | 0.62±0.027  | 0.66±0.029 | 0.77±0.0085 | 1.11±0.14  |
| WC                 | 1.14±0.01   | 1.15±0.03  | 1.19±0.02   | 1.35±0.01  |
| CDRSO <sub>2</sub> | 0.52±0.02   | 0.56±0.01  | 0.60±0.0014 | 0.78±0.01  |
| CD                 | 2.28±0.02   | 2.24±0.06  | 2.39±0.1    | 2.68±0.07  |
| Hue                | 0.72±0.01   | 0.72±0.03  | 0.72±0.02   | 0.70±0.032 |

Abbreviations: Control, anaerobic wine (0 mg O<sub>2</sub>/L per time); LO, low-level oxygenation wine (0.5–0.9 mg O<sub>2</sub>/L per time); MO, medium-level oxygenation wine (1–1.9 mg O<sub>2</sub>/L per time); HO, high-level oxygenation wine (3–3.9 mg O<sub>2</sub>/L per time); polymeric, polymeric anthocyanins; monomeric, monomeric anthocyanins; copigmented, copigmented anthocyanins; MP, monomeric pigments; SPP, small polymeric pigments; LPP, large polymeric pigments; CD, color density.

**Table S4.** The evolution of selected chemical parameters (means of four values) during the oxygenation cycles

| Wine     | TCO<br>(mg/L) | TP<br>(mg/L) | Tannin<br>(mg/L) | MP     | SPP    | LPP    | WC      | CDRSO <sub>2</sub> | CD     | Hue     | Monomeric<br>(%) | Copigmented<br>(%) | Polymeric<br>(%) | a*   | b*   | L*   | C*ab | H*ab | E   |
|----------|---------------|--------------|------------------|--------|--------|--------|---------|--------------------|--------|---------|------------------|--------------------|------------------|------|------|------|------|------|-----|
| initial  | 0             | 1438.56      | 611.51           | 1.59   | 0.76   | 0.6    | 1.13    | 0.51               | 2.26   | 0.7     | 33.52            | 22.08              | 44.4             | 46.5 | 12.3 | 49.6 | 48.1 | 14.6 | 0   |
| CKphase1 | 0             | 1400.77      | 595.6779         | 1.62   | 0.78   | 0.62   | 1.12    | 0.51               | 2.26   | 0.69    | 33.17            | 22.15              | 44.68            | 46.5 | 12.3 | 49.7 | 48.1 | 14.8 | 0   |
| CKphase2 | 0             | 1482.21      | 613.9915         | 1.61   | 0.73   | 0.61   | 1.12    | 0.52               | 2.28   | 0.72    | 32.94            | 21.01              | 46.05            | 46.7 | 12.1 | 49.5 | 48.2 | 14.5 | 0   |
| CKphase3 | 0             | 1450.11      | 619.1622         | 1.65   | 0.77   | 0.61   | 1.13    | 0.52               | 2.28   | 0.71    | 32.5             | 21.59              | 45.91            | 46   | 12.4 | 49.7 | 47.6 | 15.1 | 0   |
| CKphase4 | 0             | 1407.28      | 605.935          | 1.6    | 0.76   | 0.61   | 1.13    | 0.53               | 2.29   | 0.72    | 32.5             | 22                 | 45.5             | 45.5 | 13.3 | 49.2 | 48.3 | 16   | 0   |
| CKphase5 | 0             | 1429.144     | 585.31           | 1.6485 | 0.7865 | 0.6225 | 1.14077 | 0.5238             | 2.2836 | 0.71854 | 32.3             | 21.8               | 45.91642         | 45.5 | 12.5 | 49.3 | 47.2 | 15.4 | 0   |
| LOphase1 | 0.63          | 1421.67      | 604.5657         | 1.61   | 0.78   | 0.62   | 1.13    | 0.52               | 2.25   | 0.71    | 32.28            | 22.35              | 45.37            | 45   | 12.1 | 49.9 | 46.6 | 15.1 | 1.5 |
| LOphase2 | 1.33          | 1399.14      | 588.2281         | 1.62   | 0.78   | 0.62   | 1.14    | 0.53               | 2.26   | 0.71    | 32.15            | 22.09              | 45.76            | 45.1 | 12   | 49.9 | 46.7 | 14.9 | 1.7 |
| LOphase3 | 2.03          | 1501.12      | 638.3518         | 1.63   | 0.79   | 0.62   | 1.13    | 0.53               | 2.26   | 0.71    | 31.23            | 22.11              | 46.66            | 46.5 | 12.3 | 49.7 | 48.1 | 14.8 | 0.1 |
| LOphase4 | 2.53          | 1432.33      | 585.9087         | 1.67   | 0.82   | 0.63   | 1.13    | 0.53               | 2.23   | 0.72    | 30.23            | 22.51              | 47.26            | 44.6 | 11.2 | 50.4 | 46   | 14.1 | 2   |
| LOphase5 | 3.03          | 1454.46      | 645.6587         | 1.69   | 0.77   | 0.64   | 1.15    | 0.54               | 2.28   | 0.72    | 30.53            | 22.05              | 47.42            | 44.5 | 12.2 | 49.2 | 46.1 | 15.3 | 2.2 |
| MOphase1 | 1.4           | 1382.73      | 563.3891         | 1.7    | 0.81   | 0.63   | 1.14    | 0.55               | 2.25   | 0.72    | 28.95            | 22.77              | 48.28            | 45.4 | 13.7 | 49.2 | 47.5 | 16.8 | 1.1 |
| MOphase2 | 2.52          | 1342.44      | 533.87           | 1.739  | 0.824  | 0.6595 | 1.15283 | 0.55603            | 2.2439 | 0.71823 | 27.84            | 22.9               | 48.2365          | 44.9 | 13.5 | 50   | 46.8 | 16.7 | 1.4 |
| MOphase3 | 3.58          | 1495.33      | 635.8896         | 1.68   | 0.81   | 0.65   | 1.15    | 0.54               | 2.28   | 0.72    | 31.15            | 22.06              | 46.79            | 46.1 | 12   | 49.5 | 47.7 | 14.6 | 0.5 |
| MOphase4 | 4.64          | 1401.47      | 629.2568         | 1.72   | 0.8    | 0.69   | 1.15    | 0.54               | 2.29   | 0.71    | 29.15            | 21.03              | 49.82            | 45.2 | 15.5 | 49.2 | 47.8 | 18.9 | 3.3 |
| MOphase5 | 6.33          | 1422.65      | 622.5397         | 1.75   | 0.813  | 0.71   | 1.17    | 0.56               | 2.32   | 0.72    | 28.7             | 21.98              | 49.32            | 45.6 | 15.5 | 48.4 | 48.2 | 18.7 | 2.5 |
| HOphase1 | 3.41          | 1429.752     | 604.84           | 1.763  | 0.8255 | 0.7695 | 1.1927  | 0.59637            | 2.3908 | 0.7239  | 28.04            | 21.96              | 50.00144         | 45.6 | 15.4 | 48.3 | 48.1 | 18.7 | 3.1 |
| HOphase2 | 7.29          | 1399.22      | 618.7409         | 1.73   | 0.83   | 0.69   | 1.19    | 0.55               | 2.36   | 0.7     | 29.57            | 22.15              | 48.28            | 44.9 | 13.5 | 49.8 | 46.9 | 16.8 | 2.4 |
| HOphase3 | 10.47         | 1385.81      | 596.2847         | 1.75   | 0.85   | 0.79   | 1.22    | 0.63               | 2.39   | 0.73    | 27.12            | 21.09              | 51.79            | 45.7 | 16   | 45.3 | 49.1 | 19.5 | 3.6 |
| HOphase4 | 14.12         | 1400.55      | 580.7556         | 1.8    | 0.919  | 0.93   | 1.29    | 0.69               | 2.51   | 0.71    | 23.69            | 22                 | 54.31            | 46.6 | 17.3 | 44.8 | 49.7 | 20.4 | 6   |
| HOphase5 | 17.35         | 1353.856     | 558.07           | 1.8415 | 0.983  | 1.106  | 1.35017 | 0.78037            | 2.6753 | 0.69868 | 20.03            | 22.17              | 57.79781         | 46.4 | 17.2 | 44.8 | 49.5 | 20.4 | 6.5 |

Abbreviations: CK, anaerobic wine (0 mg O<sub>2</sub>/L per time); LO, low-level oxygenation wine (0.5-0.9 mg O<sub>2</sub>/L per time); MO, medium-level oxygenation wine (1-1.9 mg O<sub>2</sub>/L per time); HO, high-level oxygenation wine (3-3.9 mg O<sub>2</sub>/L per time); TCO, total consumed oxygen; TP, total phenol (Folin–Ciocalteu assays), which were expressed as gallic acid equivalents; MP,

monomeric pigments; SPP, small polymeric pigments; LPP, large polymeric pigments; WC, total color of free anthocyanins and anthocyanins eventually involved in bisulfite adducts; CDRSO<sub>2</sub>, color due to derivatives resistant to SO<sub>2</sub> bleaching; CD, color density; polymeric, polymeric anthocyanins; monomeric, monomeric anthocyanins; copigmented, copigmented anthocyanins.

**Table S5.** Total oxygen consumption (mg/L) during treatment.

|         | CK | LO   | MO   | HO    |
|---------|----|------|------|-------|
| initial | 0  | 0    | 0    | 0     |
| phase1  | 0  | 0.63 | 1.4  | 3.41  |
| phase2  | 0  | 1.33 | 2.52 | 7.29  |
| phase3  | 0  | 2.03 | 3.58 | 10.47 |
| phase4  | 0  | 2.53 | 4.64 | 14.12 |
| phase5  | 0  | 3.03 | 6.33 | 17.35 |

Abbreviations: initial, initial wine before oxidation treatment; CK, anaerobic wine (0 mg O<sub>2</sub>/L per time); LO, low-level oxygenation wine (0.5-0.9 mg O<sub>2</sub>/L per time); MO, medium-level oxygenation wine (1-1.9 mg O<sub>2</sub>/L per time); HO, high-level oxygenation wine (3-3.9 mg O<sub>2</sub>/L per time).
